# Supplementary material
Source: Springer Nature journal article supplement (https://www.springermedizin.de/resource/supplementary/13054_2014_2474_MOESM5_ESM.pdf/9714182)
Supplement: MOESM5 [file 9714182]

**Table 3** Risk of bias and methodological quality assessment of included RCTs

| <b>Study</b>                            | <b>Sequence generation</b> | <b>Allocation concealment</b> | <b>Blinding</b> | <b>Incomplete outcome data</b> | <b>Selective outcome reporting</b> | <b>Other bias</b> | <b>Summary</b> |
|-----------------------------------------|----------------------------|-------------------------------|-----------------|--------------------------------|------------------------------------|-------------------|----------------|
| <i>Bein et al. 2013</i> <sup>19</sup>   | Low                        | Low                           | Non-blinded     | Low                            | Low                                | Low <sup>a</sup>  | Low            |
| <i>Morris et al. 1994</i> <sup>18</sup> | Unclear                    | Low                           | Non-blinded     | Low                            | Low                                | High <sup>b</sup> | Low            |

<sup>a</sup> Trial stopped early due to futility.

<sup>b</sup> Trial stopped early after an interim analysis showed treatment effect too small to be demonstrated by proposed sample size.
